# Supplementary material for: The Potential of Micromammals for the Stratigraphy and the Timing of Human Occupations at La Roche-à-Pierrot (Saint-Césaire, France)
Source: MDPI journal article supplement (doi:10.3390/quat4040033), 2021-10-21
Supplement: s1 [file s1]

**Table S1.** Micromammal MNE (Minimum Number of Elements) for each spit and SU.

| Spit    | Maxilla | Mandible | Molar | Incisor | Scapula | Humerus | Radius | Ulna | Femur | Tibia | Calc. | Astra. | Phal.+met. | Vertebra | Innom. | Ribs |
|---------|---------|----------|-------|---------|---------|---------|--------|------|-------|-------|-------|--------|------------|----------|--------|------|
| 150-152 | 52      | 80       | 169   | 74      | 6       | 38      | 5      | 13   | 44    | 22    | 12    | 3      | 12         | 14       | 5      | 0    |
| 152-154 | 37      | 64       | 202   | 72      | 7       | 52      | 2      | 12   | 36    | 14    | 4     | 2      | 3          | 22       | 10     | 2    |
| 154-156 | 25      | 58       | 105   | 47      | 2       | 39      | 2      | 17   | 36    | 11    | 3     | 4      | 5          | 10       | 4      | 1    |
| 156-158 | 37      | 51       | 158   | 47      | 6       | 53      | 1      | 13   | 33    | 20    | 4     | 0      | 1          | 12       | 10     | 2    |
| 158-160 | 34      | 56       | 124   | 31      | 0       | 40      | 0      | 14   | 29    | 11    | 3     | 1      | 3          | 15       | 7      | 0    |
| 160-162 | 22      | 46       | 113   | 31      | 2       | 43      | 1      | 7    | 25    | 11    | 1     | 0      | 1          | 7        | 5      | 0    |
| 162-164 | 50      | 77       | 206   | 53      | 5       | 60      | 2      | 20   | 37    | 16    | 8     | 0      | 6          | 16       | 9      | 1    |
| 164-166 | 48      | 84       | 252   | 42      | 7       | 71      | 2      | 23   | 48    | 29    | 5     | 0      | 3          | 16       | 12     | 0    |
| 166-168 | 21      | 68       | 153   | 24      | 6       | 47      | 2      | 17   | 34    | 16    | 19    | 1      | 6          | 17       | 8      | 0    |
| 168-170 | 62      | 93       | 195   | 17      | 4       | 85      | 0      | 23   | 74    | 19    | 5     | 1      | 3          | 18       | 12     | 0    |
| 170-172 | 35      | 43       | 108   | 21      | 2       | 36      | 0      | 8    | 41    | 15    | 2     | 0      | 1          | 8        | 4      | 0    |
| 172-174 | 30      | 41       | 75    | 14      | 3       | 26      | 0      | 13   | 24    | 12    | 1     | 1      | 3          | 8        | 5      | 0    |
| 174-176 | 28      | 67       | 142   | 37      | 2       | 45      | 4      | 12   | 31    | 16    | 1     | 0      | 3          | 6        | 4      | 0    |
| 176-178 | 51      | 85       | 173   | 46      | 6       | 62      | 6      | 9    | 53    | 19    | 9     | 1      | 2          | 22       | 13     | 0    |
| 178-180 | 32      | 61       | 77    | 36      | 6       | 41      | 0      | 8    | 43    | 8     | 4     | 2      | 1          | 10       | 5      | 0    |
| 180-182 | 20      | 19       | 41    | 20      | 2       | 11      | 0      | 6    | 9     | 7     | 3     | 1      | 0          | 8        | 2      | 0    |
| 182-184 | 9       | 21       | 24    | 5       | 1       | 9       | 0      | 6    | 7     | 2     | 0     | 0      | 0          | 1        | 0      | 0    |
| 184-186 | 11      | 15       | 35    | 10      | 0       | 16      | 0      | 3    | 11    | 9     | 0     | 0      | 0          | 3        | 1      | 0    |
| 186-188 | 16      | 43       | 122   | 47      | 1       | 29      | 0      | 3    | 26    | 9     | 4     | 2      | 0          | 5        | 5      | 0    |
| 188-190 | 14      | 38       | 89    | 21      | 1       | 19      | 1      | 6    | 12    | 6     | 0     | 0      | 1          | 0        | 1      | 0    |
| 190-192 | 19      | 38       | 97    | 34      | 3       | 30      | 1      | 10   | 23    | 8     | 2     | 1      | 2          | 0        | 2      | 0    |
| 192-194 | 13      | 30       | 82    | 16      | 0       | 19      | 0      | 2    | 10    | 5     | 1     | 0      | 1          | 2        | 2      | 0    |
| 194-196 | 10      | 23       | 70    | 19      | 1       | 12      | 0      | 1    | 6     | 6     | 1     | 1      | 0          | 0        | 0      | 0    |

|          |     |     |      |     |    |     |    |     |     |     |    |    |    |    |    |   |
|----------|-----|-----|------|-----|----|-----|----|-----|-----|-----|----|----|----|----|----|---|
| 196-198  | 2   | 16  | 35   | 22  | 0  | 8   | 1  | 2   | 6   | 5   | 1  | 0  | 0  | 0  | 0  | 0 |
| 198-200  | 4   | 11  | 33   | 12  | 1  | 6   | 0  | 3   | 0   | 4   | 0  | 0  | 0  | 3  | 0  | 0 |
| 200-202  | 1   | 0   | 6    | 0   | 0  | 1   | 0  | 1   | 1   | 0   | 0  | 0  | 0  | 0  | 0  | 0 |
| 202-204  | 2   | 9   | 37   | 12  | 0  | 7   | 0  | 0   | 3   | 3   | 1  | 0  | 3  | 0  | 0  | 0 |
| 204-206  | 5   | 6   | 38   | 0   | 0  | 3   | 0  | 0   | 3   | 2   | 0  | 0  | 0  | 2  | 1  | 0 |
| 206-208  | 7   | 2   | 19   | 2   | 0  | 4   | 1  | 2   | 2   | 1   | 0  | 0  | 0  | 2  | 2  | 0 |
| 208-210  | 7   | 4   | 23   | 6   | 0  | 5   | 1  | 0   | 1   | 1   | 1  | 0  | 3  | 3  | 0  | 0 |
| 212-212  | 2   | 1   | 14   | 0   | 0  | 2   | 0  | 1   | 0   | 2   | 1  | 0  | 2  | 0  | 2  | 0 |
| 212-214  | 3   | 0   | 19   | 1   | 1  | 2   | 0  | 1   | 3   | 1   | 0  | 0  | 1  | 1  | 0  | 0 |
| SU 15H   | 11  | 26  | 56   | 6   | 0  | 13  | 1  | 4   | 17  | 4   | 1  | 1  | 2  | 5  | 1  | 0 |
| SU 15    | 131 | 224 | 602  | 234 | 19 | 128 | 9  | 58  | 122 | 66  | 23 | 12 | 39 | 64 | 30 | 3 |
| SU 15/16 | 25  | 58  | 105  | 47  | 2  | 39  | 2  | 17  | 36  | 11  | 3  | 4  | 5  | 10 | 4  | 1 |
| SU 16    | 93  | 153 | 395  | 109 | 8  | 136 | 2  | 34  | 87  | 42  | 8  | 1  | 5  | 34 | 22 | 2 |
| SU 16/17 | 111 | 203 | 579  | 109 | 15 | 160 | 5  | 55  | 113 | 58  | 25 | 0  | 11 | 47 | 28 | 1 |
| SU 17    | 314 | 530 | 1064 | 276 | 32 | 396 | 11 | 105 | 334 | 123 | 40 | 10 | 18 | 88 | 51 | 0 |
| SU 17/18 | 34  | 97  | 249  | 73  | 4  | 58  | 3  | 10  | 42  | 17  | 3  | 0  | 2  | 4  | 6  | 0 |
| SU 18    | 43  | 77  | 282  | 64  | 0  | 45  | 2  | 10  | 22  | 26  | 4  | 1  | 9  | 11 | 6  | 0 |
| SU18/19  | 2   | 0   | 13   | 1   | 1  | 1   | 0  | 0   | 2   | 1   | 0  | 0  | 1  | 1  | 0  | 0 |
| SU 19    | 1   | 0   | 6    | 0   | 0  | 1   | 0  | 1   | 1   | 0   | 0  | 0  | 0  | 0  | 0  | 0 |

**Table S2.** Variables taken into account for the correlation test along the spit sequence. N = Number of remains and W = weight of faunal remains and lithic artefacts recovered from the sieve residues (g/L).

| Spit    | Density | MNE<br>micro | N fauna<br>(J4 III) | N fauna<br>(J4 III-<br>IV) | N lithics<br>(J4 III) | N lithics<br>(J4 III-<br>IV) | W fauna | W lithics |
|---------|---------|--------------|---------------------|----------------------------|-----------------------|------------------------------|---------|-----------|
| 150-152 | 183.0   | 549          | 4                   | 6                          | 1                     | 1                            | 7.7     | 5.0       |
| 152-154 | 144.3   | 541          | 23                  | 24                         | 2                     | 2                            | 9.1     | 6.7       |
| 154-156 | 92.3    | 369          | 13                  | 13                         | 0                     | 0                            | 7.0     | 3.8       |
| 156-158 | 96.1    | 448          | 8                   | 8                          | 3                     | 3                            | 6.2     | 4.2       |
| 158-160 | 75.5    | 368          | 11                  | 11                         | 4                     | 4                            | 3.1     | 1.6       |
| 160-162 | 63.7    | 315          | 10                  | 10                         | 7                     | 7                            | 1.8     | 2.4       |
| 162-164 | 81.7    | 566          | 6                   | 6                          | 2                     | 2                            | 1.3     | 0.1       |
| 164-166 | 95.4    | 642          | 4                   | 4                          | 0                     | 0                            | 1.3     | 0.7       |
| 166-168 | 102.1   | 691          | 9                   | 8                          | 0                     | 0                            | 3.3     | 0.3       |
| 168-170 | 77.1    | 611          | 16                  | 16                         | 2                     | 2                            | 2.0     | 0.3       |
| 170-172 | 49.7    | 324          | 10                  | 10                         | 0                     | 0                            | 0.7     | 0.6       |
| 172-174 | 30.3    | 256          | 6                   | 6                          | 1                     | 1                            | 1.2     | 0.3       |
| 174-176 | 54.9    | 398          | 2                   | 2                          | 0                     | 0                            | 1.6     | 0.4       |
| 176-178 | 79.8    | 557          | 4                   | 4                          | 0                     | 0                            | 1.1     | 0.1       |
| 178-180 | 44.0    | 334          | 7                   | 7                          | 0                     | 0                            | 1.2     | 0.6       |
| 180-182 | 22.2    | 149          | 4                   | 4                          | 0                     | 0                            | 1.0     | 0.5       |
| 182-184 | 13.6    | 85           | 4                   | 4                          | 0                     | 0                            | 0.6     | 0.3       |
| 184-186 | 15.7    | 114          | 8                   | 11                         | 0                     | 0                            | 1.1     | 0.9       |
| 186-188 | 40.0    | 312          | 6                   | 11                         | 2                     | 2                            | 2.3     | 0.7       |
| 188-190 | 25.1    | 209          | 6                   | 8                          | 1                     | 1                            | 1.8     | 1.7       |
| 190-192 | 53.8    | 270          | 10                  | 12                         | 5                     | 5                            | 2.3     | 1.6       |
| 192-194 | 31.5    | 183          | 11                  | 16                         | 9                     | 9                            | 2.8     | 0.5       |
| 194-196 | 18.1    | 150          | 23                  | 25                         | 5                     | 6                            | 4.0     | 2.0       |
| 196-198 | 11.4    | 98           | 17                  | 20                         | 10                    | 10                           | 4.9     | 3.1       |
| 198-200 | 8.0     | 77           | 21                  | 34                         | 4                     | 6                            | 7.8     | 3.4       |
| 200-202 | 10.0    | 33           | 17                  | 27                         | 10                    | 14                           | 8.8     | 3.6       |
| 202-204 | 17.8    | 77           | 12                  | 26                         | 14                    | 18                           | 9.3     | 5.1       |
| 204-206 | 18.8    | 60           | 6                   | 16                         | 7                     | 16                           | 3.3     | 3.3       |
| 206-208 | 13.5    | 44           | 1                   | 11                         | 5                     | 10                           | 9.1     | 6.6       |
| 208-210 | 10.2    | 55           | 4                   | 22                         | 0                     | 19                           | 9.5     | 7.1       |
| 210-212 | 5.8     | 27           | 0                   | 19                         | 0                     | 20                           | 2.2     | 3.3       |
| 212-214 | 7.3     | 33           | 2                   | 23                         | 3                     | 19                           | 2.8     | 2.1       |
